# Supplementary material for: First-principles investigation on the electronic structures of CdSexS1−x and simulation of CdTe solar cell with a CdSexS1−x window layer by SCAPS
Source: Royal Society of Chemistry journal article supplement (doi:10.1039/d2ra03053e), 2022-01-01
Supplement: d2ra03053e2.pdf [file d2ra03053e2.pdf]

## Supplementary Information

### First-Principles Investigation on the Electronic Structures of $\text{CdSe}_x\text{S}_{1-x}$ and Simulation of CdTe Solar Cell with $\text{CdSe}_x\text{S}_{1-x}$

#### Window Layer by SCAPS

Xu He <sup>a,b</sup>, Chunxiu Li <sup>b,c</sup>, Lili Wu <sup>b</sup>, Xia Hao <sup>d</sup>, Jingquan Zhang <sup>b</sup>, Lianghuan Feng <sup>b</sup>,  
Peng Tang <sup>a,b,\*</sup>, Zheng Du <sup>d</sup>

<sup>a</sup> Chengdu Textile College, Chengdu 611731, China

<sup>b</sup> College of Materials Science and Engineering, Sichuan University, Chengdu 610065, China

<sup>c</sup> LONGi Solar Technology Co., Ltd, Xi'an 710100, China

<sup>d</sup> Institute of New Energy and Low-carbon Technology, Sichuan University, Chengdu 610065, China

<sup>e</sup> National Supercomputing Center in Shenzhen, Shenzhen 518055, China

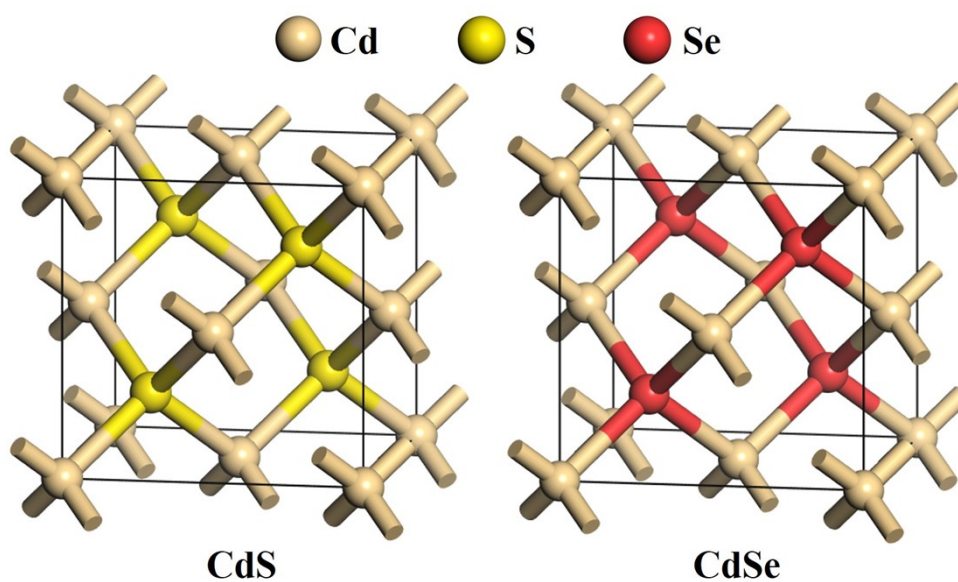

**Fig.S1** Crystal structure of cubic zinc-blende CdS and CdSe

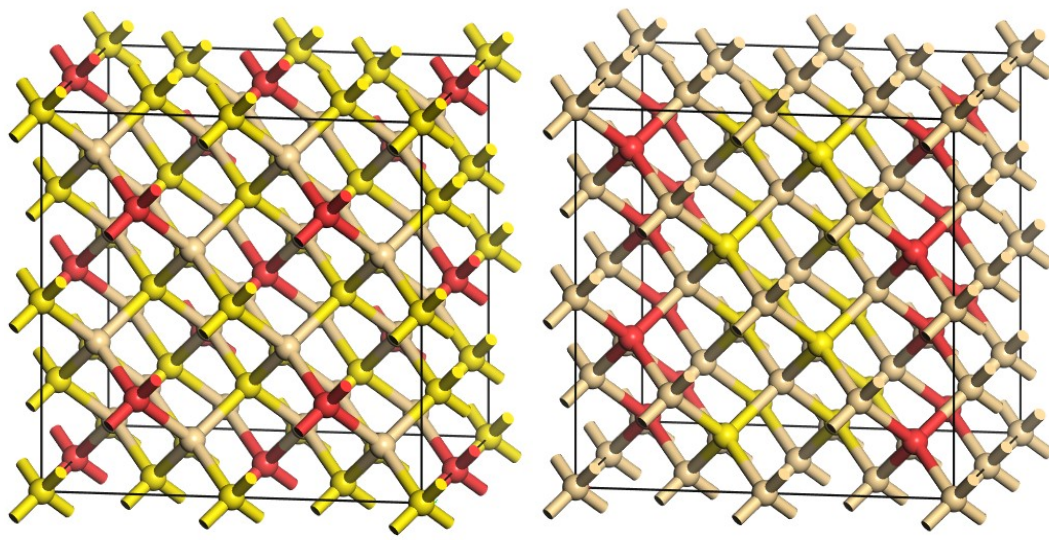

(a)  $x = 0.25$

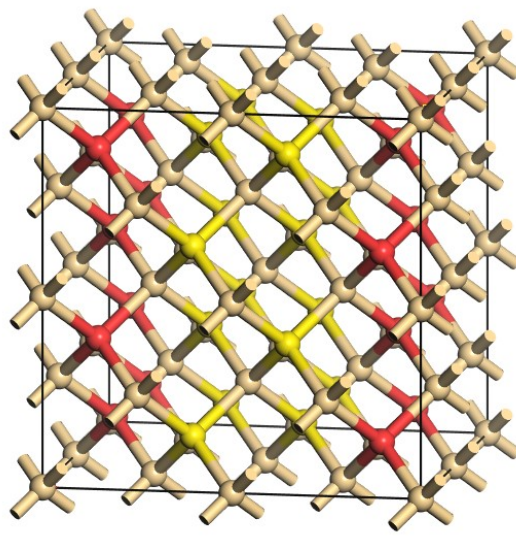

(b)  $x = 0.5$

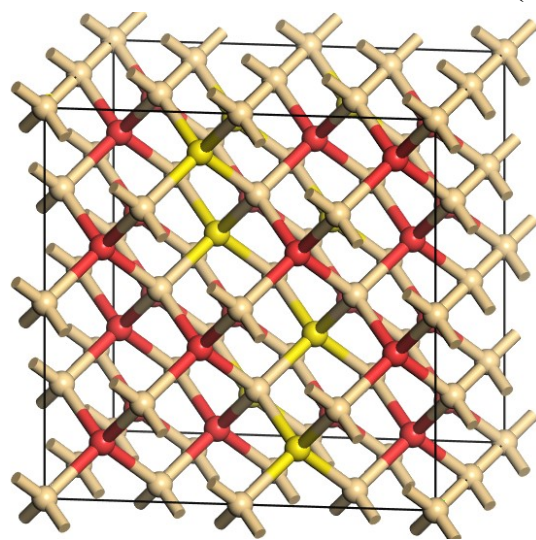

(c)  $x = 0.75$

**Fig.S2 Crystal structure of cubic zinc-blende CdSe<sub>x</sub>S<sub>1-x</sub> supercell**

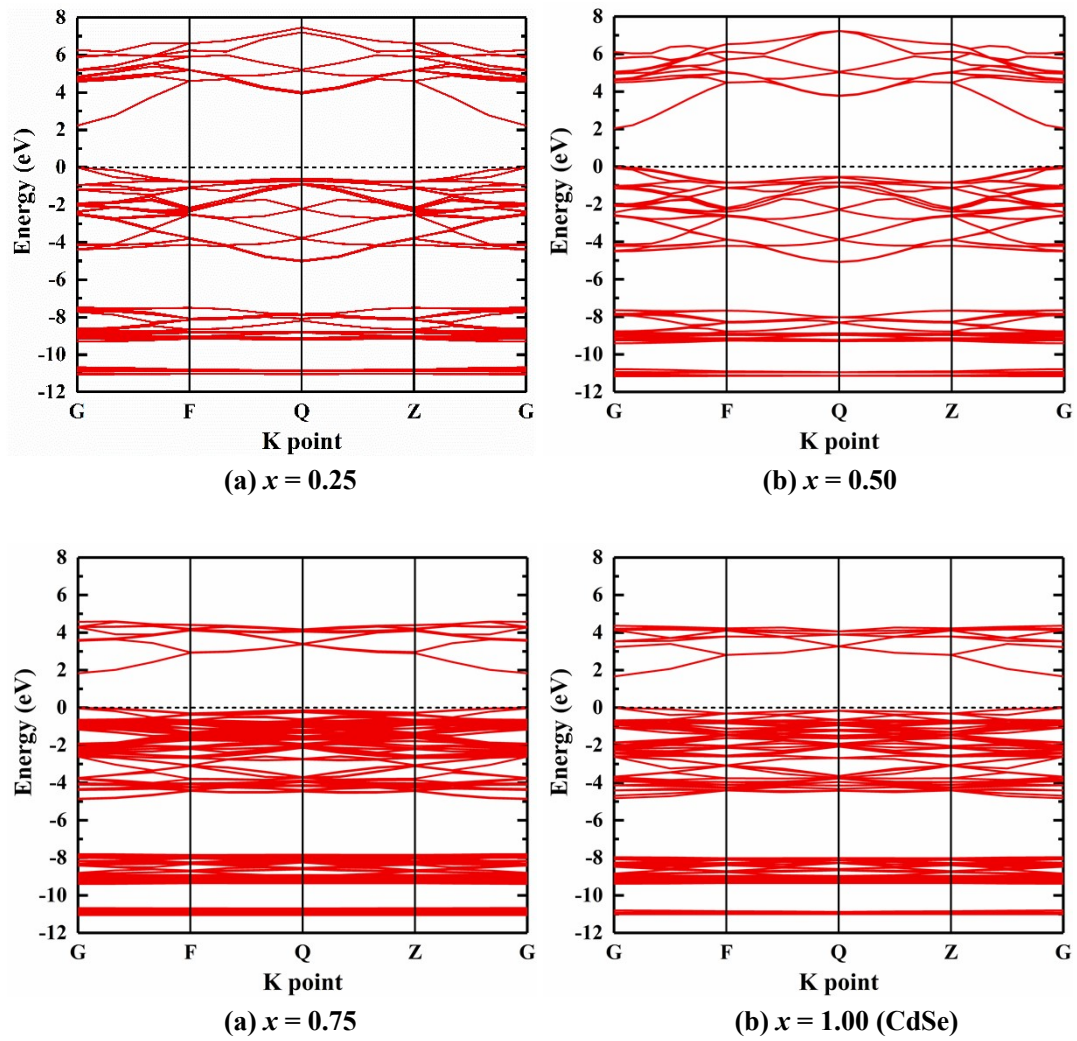

**Fig.S3 Band structure of cubic zinc-blende  $\text{CdSe}_x\text{S}_{1-x}$  ( $0.25 \leq x \leq 1.00$ )**
